# Supplementary material for: The effect of posterior pericardiotomy after thoracic aortic surgery
Source: Research Square preprint supplement (doi:10.21203/rs.3.rs-1464311/v1), 2022-03-22
Supplement: Supplementary file 1 [file 103cfbd55006bdcee4370c1c.docx]

Table 5 Intraoperative and postoperative outcomes

AF (-) (n= 113) AF (+) (n= 88) p value

Procedure

Ascending replacement 55(48.6) 38(43.1) 0.52

TAR 18(15.9) 16(18.1) 0.81

TAR+FET 38(33.6) 24(27.2) 0.41

Others 2(1.7) 0 0.59

PP 53(46.9) 35(39.7) 0.38

Operative data

Duration(minutes)

Operation 392.4±89.2 393.7±71.1 0.91

Cardiopulmonary bypass 227.1±49.3 229.9±46.1 0.68

Selective cerebral perfusion 109.1±63.2 119.7±57.0 0.22

Circulatory arrest 44.9±14.3 46.2±18.5 0.55

Cardiac arrest 150.2±31.7 148.0±27.9 0.61

Blood loss (ml) 1687.0±1076.7 1758.5±926.5 0.62

Transfusion(ml) 2283.0±1109.1 2164.3±858.6 0.41

Minimum pharyngeal temp.(℃) 24.5±0.6 24.4±0.8 0.38

Mechanical ventilation time (hr) 12.3±8.2 11.4±8.1 0.43

Length of ICU stay (days) 3.2±1.7 4.1±2.3 0.003

RRT 0 3(3.4) 0.16

Modified Rankin Scale 2.8±0.7 2.9±0.6 0.19

Length of hospital stay(days) 18.1±7.6 21.8±15.9 0.03

Stroke 12(10.6) 8(9.0) 0.90

Parameters of drains (operative)

Pericardial total drainage(ml) 303.1±192.8 408.8±388.1 0.01

Duration of pericardial drain(days) 2.3±0.6 2.7±1.4 0.02

Mediastinal total drainage(ml) 381.5±216.5 461.8±352.3 0.05

Duration of mediastinal drain(days) 2.3±0.7 2.7±1.4 0.04

Left pleural total drainage(ml) 905.1±680.5 1026.1±704.0 0.35

Duration of left pleural drain(days) 3.7±1.9 4.5±2.1 0.04

Right pleural total drainage(ml) 618.0±516.9 593.3±459.8 0.83

Duration of right pleural drain(days) 3.6±1.8 3.5±1.6 0.91

WBC 8279.6±2389.3 8370.4±2951.7 0.81

CRP 10.3±5.7 12.2±6.2 0.03

Total hospitalization costs(yen) 6196852.3±1249234.9 6524529.4±1447253.7 0.11

AF: atrial fibrillation, TAR: total arch replacement, FET: frozen elephant trunk

PP: posterior pericardiotomy WBC: white blood cell CRP: C-reactive protein RRT: renal replacement therapy
